# Supplementary material
Source: PubMed Central journal article supplement (PMC6604619)
Supplement: NIHMS1023927-supplement-Supplementary_Figures.pdf [file NIHMS1023927-supplement-Supplementary_Figures.pdf]

**Supplemental Table 1.** Mouse real-time PCR primer sequence and shRNA sequences

| <b>Gene Names</b>     | <b>Forward</b>                                                  | <b>Reverse</b>                |
|-----------------------|-----------------------------------------------------------------|-------------------------------|
| <b>ACSL1</b>          | ATCTGGTGGAAACGAGGCAAG                                           | TCCTTTGGGGTTGCCTGTAG          |
| <b>ACSL3</b>          | TCTTGCAAACAAAGCTGAAGGA                                          | GGTTGGAGGCTTCCCATCAA          |
| <b>ACSL4</b>          | CTTCTCTTAAGGCCGGGAC                                             | TGCCATAGCGTTTTTCTTAGATTT      |
| <b>ACSL5</b>          | GGCCAAACAGAATGCACAGG                                            | GATGCAGATCTCGCCTTCGT          |
| <b>SREBP1C</b>        | CAAGGCCATCGACTACATCCG                                           | CACCACTTCGGGTTTCATGC          |
| <b>ACC1</b>           | AGCACAGCTCCAGATTGCCA                                            | GGAGATACCCCATACATCATAC        |
| <b>FASN</b>           | GTGATAGCCGGTATGTCGGG                                            | TAGAGCCCAGCCTTCCATCT          |
| <b>SCD1</b>           | CTGCAGGTTGTGCTAGATGGGATG<br>G                                   | GCCTGGGGTCTTTGGTAAGTAGG<br>C  |
| <b>DGAT1</b>          | TGGTAGTGGGCCCAAGGTAG                                            | GAATCTTGCAGACGATGGCAC         |
| <b>DGAT2</b>          | GGCTACGTTGGCTGGTAACT                                            | TCTTCAGGGTGACTGCGTTC          |
| <b>ELOVL3</b>         | TACTTCTTTGGCTCTCGCCC                                            | AGCTTACCCAGTACTCCTCCA         |
| <b>LDLR</b>           | ACCTGCCGACCTGATGAATTC                                           | GCAGTCATGTTACGGTCACA          |
| <b>PCSK9</b>          | TTGCAGCAGCTGGGAACTT                                             | CCGACTGTGATGACCTCTGGA         |
| <b>HMGCR</b>          | CTTTCAGAAACGAACTGTAGCTCA<br>C                                   | CTAGTGGAAGATGAATGGACATG<br>AT |
| <b>HMGCS1</b>         | TTTGATGCAGCTGTTTGAGG                                            | CCACCTGTAGGTCTGGCATT          |
| <b>SREBP2</b>         | CCAAAGAAGGAGAGAGGCGG                                            | CGCCAGACTTGTGCATCTTG          |
| <b>ACAT1</b>          | CAGGAAGTAAGATGCCTGGAAC                                          | TTCACCCCCTTGGATGACATT         |
| <b>ACAT2</b>          | CCCGTGGTCATCGTCTCAG                                             | GGACAGGGCACCATTGAAGG          |
| <b>ACLY</b>           | TGCCCCAAGATTCAGTCCCA                                            | ACGATGGCCTTGGTATGTGC          |
| <b>PMVK</b>           | TCTACTGAGCGGGTCCACTT                                            | CTCCAAGTCTGCTCTTCAGCC         |
| <b>SHP</b>            | CCGTGGAATGGAGTCTGG                                              | CTTGCTGGACAGTTAGTAGTG         |
| <b>CYP7A1</b>         | GGGATTGCTGTGGTAGTGAGC                                           | GGTATGGAATCAACCCGTTGTC        |
| <b>CYP8B1</b>         | GATGGCACCCGAAAGTGGA                                             | TAGTGGTGGATCTTCTTGCC          |
| <b>CYP7B1</b>         | CCCTGCGTGACGAAATTGAC                                            | AGAATAGTGCTTTCAGGCAGA         |
| <b>CYP27A1</b>        | CCAGGCACAGGAGAGTACG                                             | GGGCAAGTGCAGCACATAG           |
| <b>CYP46A1</b>        | CACCCTGGCAAAGTTCATGC                                            | CAGAACCTCATCGTCCTGAGC         |
| <b>BAAT</b>           | GGTTGCTGTAAAACACTGTTTTG<br>G                                    | TGTGCACAGGCTCATCAACA          |
| <b>ACOX2</b>          | TCGGCAAAAACCTTCCAAATC                                           | GGCTGTGTATCACAAACTCCTG        |
| <b>GAPDH</b>          | ATGGTGAAGGTCGGTGTGAA                                            | ACTGGAACATGTAGACCATGTAG<br>T  |
| <b>ACSL1 shRNA</b>    | CCGGCCGAAGATCTTGCGATAATTTCTCGAGAAATTATCGCAAGATCTT<br>CGGTTTTTG  |                               |
| <b>Scramble shRNA</b> | GACACGCGACTTGTACCACTTCAAGAGAGTGGTACAAGTCGCGTGTCTT<br>TTTTACGCGT |                               |

**Supplemental Table 2.** Individual BA levels of pooled serum samples of Ad-shAcs11 and Ad-shU6-C injected mice were quantified.

|              | Ad-shU6-C<br>( $\mu\text{M}$ ) | Ad-shAcs11 ( $\mu\text{M}$ ) |
|--------------|--------------------------------|------------------------------|
| <b>CDCA</b>  | 31.1                           | n.a.                         |
| <b>CA</b>    | 39.3                           | 50.2                         |
| <b>DCA</b>   | 59.7                           | 61.9                         |
| <b>LCA</b>   | 41.1                           | 38.7                         |
| <b>TCDCA</b> | 5.9                            | 10.9                         |
| <b>TCA</b>   | 180.8                          | 92.7                         |
| <b>TDCA</b>  | 4.2                            | 6.8                          |
| <b>TLCA</b>  | 5.2                            | 6.6                          |
| <b>Total</b> | <b>367.3</b>                   | <b>267.8</b>                 |

**Supplemental Table 3.** A detailed list of genes and fold changes in Reactome pathways presented in Figure 5 B, D and supplemental Figure 3 A-D.

**BILE ACID METABOLISM**

| <b>List of Gene</b> | <b>Gene Symbol</b> | <b>Gene Title</b>                                                            | <b>Fold Change</b> | <b>P value</b> |
|---------------------|--------------------|------------------------------------------------------------------------------|--------------------|----------------|
| 1                   | CH25H              | Cholesterol 25-hydroxylase                                                   | 1.70               | 0.005          |
| 2                   | CYP7A1             | Cytochrome p450 family 7 subfamily a member 1                                | 1.30               | 0.160          |
| 3                   | ALB                | Albumin                                                                      | 1.00               | 0.600          |
| 4                   | CYP39A1            | Cytochrome p450 family 39 subfamily a member 1                               | 1.00               | 0.670          |
| 5                   | FABP6              | Fatty acid binding protein 6                                                 | -1.10              | 0.530          |
| 6                   | ABCC3              | ATP binding cassette subfamily c member 3                                    | -1.10              | 0.450          |
| 7                   | ABCB11             | ATP binding cassette subfamily b member 11                                   | -1.10              | 0.440          |
| 8                   |                    | Hydroxy-delta-5-steroid dehydrogenase, 3 beta- and steroid delta-isomerase 7 |                    |                |
|                     | HSD3B7             |                                                                              | -1.10              | 0.400          |
| 9                   | SLC27A2            | Solute carrier family 27 member 2                                            | -1.10              | 0.099          |
| 10                  | SCP2               | Sterol carrier protein 2                                                     | -1.20              | 0.026          |
| 11                  | SLC10A1            | Solute carrier family 10 member 1                                            | -1.30              | 0.099          |
| 12                  | CYP27A1            | Cytochrome p450 family 27 subfamily a member 1                               | -1.30              | 0.046          |
| 13                  | SLC27A5            | Solute carrier family 27 member 5                                            | -1.30              | 0.042          |
| 14                  | CYP46A1            | Cytochrome p450 family 46 subfamily a member 1                               | -1.30              | 0.014          |
| 15                  | HSD17B4            | Hydroxysteroid 17-beta dehydrogenase 4                                       | -1.30              | 0.004          |
| 16                  | AMACR              | Alpha-methylacyl-coa racemase                                                | -1.40              | 0.003          |
| 17                  | ACOX2              | Acyl-coa oxidase 2                                                           | -1.40              | 0.001          |
| 18                  | AKR1D1             | Aaldo-keto reductase family 1 member d1                                      | -1.50              | 0.013          |
| 19                  | ACOT8              | Acyl-coa thioesterase 8                                                      | -1.60              | 0.003          |
| 20                  | CYP7B1             | Cytochrome p450 family 7 subfamily b member 1                                | -2.00              | 0.033          |
| 21                  | SLC10A2            | Solute carrier family 10 member 2                                            | -2.00              | 0.001          |
| 22                  | BAAT               | Bile acid-coa:amino acid n-acyltransferase                                   | -2.00              | 0.000          |
| 23                  | CYP8B1             | Cytochrome p450 family 8 subfamily b member 1                                | -2.30              | 0.018          |

## CHOLESTEROL METABOLISM

| List of Gene | Gene Symbol | Gene Title                                                 | Fold Change | P value |
|--------------|-------------|------------------------------------------------------------|-------------|---------|
| 1            | APP         | Amyloid beta precursor protein                             | 2.20        | 0.000   |
| 2            | CLN6        | Ceroid-lipofuscinosis, neuronal 6, late infantile, variant | 2.50        | 0.000   |
| 3            | LEPR        | Leptin receptor                                            | 3.20        | 0.000   |
| 4            | CFTR        | Cystic fibrosis transmembrane conductance regulator        | 1.60        | 0.000   |
| 5            | CYP1B1      | Cytochrome p450 family 1 subfamily b member 1              | 4.70        | 0.001   |
| 6            | SOAT1       | Sterol o-acyltransferase 1                                 | 2.20        | 0.001   |
| 7            | ABCA1       | ATP binding cassette subfamily a member 1                  | 1.40        | 0.003   |
| 8            | ABCG1       | ATP binding cassette subfamily g member 1                  | 2.00        | 0.004   |
| 9            | CH25H       | Cholesterol 25-hydroxylase                                 | 1.70        | 0.005   |
| 10           | TRERF1      | Transcriptional regulating factor 1                        | 1.50        | 0.006   |
| 11           | NPC1        | NPC intracellular cholesterol transporter 1                | 1.30        | 0.006   |
| 12           | LRP5        | LDL receptor related protein 5                             | 1.30        | 0.006   |
| 13           | SCARB1      | Scavenger receptor class b member 1                        | 1.30        | 0.009   |
| 14           | ERLIN1      | ER lipid raft associated 1                                 | 1.40        | 0.015   |
| 15           | STARD3      | Star related lipid transfer domain containing 3            | 1.20        | 0.052   |
| 16           | PRKAA1      | Protein kinase amp-activated catalytic subunit alpha 1     | 1.20        | 0.060   |
| 17           | NPC2        | NPC intracellular cholesterol transporter 2                | 1.30        | 0.064   |
| 18           | SCAP        | SREBF chaperone                                            | 1.10        | 0.073   |
| 19           | SNX17       | Sorting nexin 17                                           | 1.20        | 0.089   |
| 20           | CYB5R1      | Cytochrome b5 reductase 1                                  | 1.30        | 0.090   |
| 21           | LBR         | Lamin b receptor                                           | 1.30        | 0.130   |
| 22           | CYP7A1      | Cytochrome p450 family 7 subfamily a member 1              | 1.30        | 0.160   |
| 23           | SORL1       | Sortilin related receptor 1                                | 1.30        | 0.230   |
| 24           | APOA1       | Apolipoprotein a1                                          | 1.10        | 0.250   |
| 25           | APOBR       | Apolipoprotein b receptor                                  | 1.20        | 0.270   |
| 26           | MBTPS2      | Membrane bound transcription factor peptidase, site 2      | 1.10        | 0.290   |
| 27           | TNFSF4      | Tumor necrosis factor superfamily member 4                 | 1.10        | 0.430   |
| 28           | CYP11B2     | Cytochrome p450 family 11 subfamily b member 2             | -1.20       | 0.220   |
| 29           | CYP39A1     | Cytochrome p450 family 39 subfamily a member 1             | 1.00        | 0.670   |
| 30           | CUBN        | Cubilin                                                    | 1.00        | 0.720   |
| 31           | LDLRAP1     | Low density lipoprotein receptor adaptor protein 1         | 1.00        | 0.750   |
| 32           | OSBPL1A     | Oxysterol binding protein like 1a                          | 1.00        | 0.770   |
| 33           | CYP11A1     | Cytochrome p450 family 11 subfamily a member 1             | 1.00        | 0.930   |
| 34           | SREBF2      | Sterol regulatory element binding transcription factor 2   | 1.00        | 0.950   |
| 35           | CEL         | Carboxyl ester lipase                                      | 1.00        | 0.950   |
| 36           | CELA3B      | Chymotrypsin like elastase family member 3b                | -1.00       | 0.980   |
| 37           | CYB5R2      | Cytochrome b5 reductase 2                                  | -1.00       | 0.930   |
| 38           | RXRA        | Retinoid x receptor alpha                                  | -1.00       | 0.850   |
| 39           | NPC1L1      | NPC1 like intracellular cholesterol transporter 1          | -1.00       | 0.740   |
| 40           | LIPC        | Lipase c, hepatic type                                     | -1.00       | 0.710   |

|    |         |                                                            |       |       |
|----|---------|------------------------------------------------------------|-------|-------|
| 41 | PPARD   | Peroxisome proliferator activated receptor delta           | -1.00 | 0.710 |
| 42 | VLDLR   | Very low-density lipoprotein receptor                      | -1.10 | 0.690 |
| 43 | CLN8    | Ceroid-lipofuscinosis, neuronal 8                          | -1.10 | 0.660 |
| 44 | ERLIN2  | ER lipid raft associated 2                                 | -1.00 | 0.640 |
| 45 | PRKAG2  | Protein kinase amp-activated non-catalytic subunit gamma 2 | -1.10 | 0.630 |
| 46 | LCAT    | Lecithin-cholesterol acyltransferase                       | -1.00 | 0.570 |
| 47 | SQLE    | Squalene epoxidase                                         | -1.20 | 0.540 |
| 48 | APOE    | Apolipoprotein e                                           | -1.00 | 0.520 |
| 49 | HDLBP   | High density lipoprotein binding protein                   | -1.00 | 0.490 |
| 50 | APOB    | Apolipoprotein b                                           | -1.10 | 0.450 |
| 51 | IL4     | Interleukin 4                                              | -1.10 | 0.330 |
| 52 | ARV1    | Arv1 homolog, fatty acid homeostasis modulator             | -1.10 | 0.300 |
| 53 | EBP     | Emopamil binding protein (sterol isomerase)                | -1.10 | 0.290 |
| 54 | LEP     | Leptin                                                     | -1.10 | 0.290 |
| 55 | HMGCS2  | 3-hydroxy-3-methylglutaryl-coa synthase 2                  | -1.10 | 0.280 |
| 56 | APOA2   | Apolipoprotein a2                                          | -1.10 | 0.260 |
| 57 | CYP19A1 | Cytochrome p450 family 19 subfamily a member 1             | -1.10 | 0.250 |
| 58 | LIPA    | Lipase a, lysosomal acid type                              | -1.10 | 0.230 |
| 59 | PON1    | Paraoxonase 1                                              | -1.20 | 0.220 |
| 60 | CYP11B1 | Cytochrome p450 family 11 subfamily b member 1             | 1.10  | 0.520 |
| 61 | FDX1    | Ferredoxin 1                                               | -1.20 | 0.190 |
| 62 | SOAT2   | Sterol o-acyltransferase 2                                 | -1.20 | 0.160 |
| 63 | HMGCR   | 3-hydroxy-3-methylglutaryl-coa reductase                   | -1.20 | 0.110 |
| 64 | CNBP    | CCHC-type zinc finger nucleic acid binding protein         | -1.10 | 0.110 |
| 65 | INSIG2  | Insulin induced gene 2                                     | -1.20 | 0.100 |
| 66 | SCARF1  | Scavenger receptor class f member 1                        | -1.10 | 0.094 |
| 67 | PRKAA2  | Protein kinase amp-activated catalytic subunit alpha 2     | -1.20 | 0.080 |
| 68 | MVD     | Mevalonate diphosphate decarboxylase                       | -1.30 | 0.078 |
| 69 | NR0B2   | Nuclear receptor subfamily 0 group b member 2              | -1.60 | 0.070 |
| 70 | HMGCS1  | 3-hydroxy-3-methylglutaryl-coa synthase 1                  | -1.30 | 0.070 |
| 71 | GGPS1   | Geranylgeranyl diphosphate synthase 1                      | -1.20 | 0.064 |
| 72 | MBTPS1  | Membrane bound transcription factor peptidase, site 1      | -1.10 | 0.056 |
| 73 | OSBPL5  | Oxysterol binding protein like 5                           | -1.30 | 0.052 |
| 74 | APOA4   | Apolipoprotein a4                                          | -1.20 | 0.047 |
| 75 | CYP27A1 | Cytochrome p450 family 27 subfamily a member 1             | -1.30 | 0.046 |
| 76 | ACAA2   | Acetyl-coa acyltransferase 2                               | -1.20 | 0.044 |
| 77 | FDXR    | Ferredoxin reductase                                       | -1.20 | 0.043 |
| 78 | LSS     | Lanosterol synthase                                        | -1.50 | 0.033 |
| 79 | CYP7B1  | Cytochrome p450 family 7 subfamily b member 1              | -2.00 | 0.033 |
| 80 | DHCR24  | 24-dehydrocholesterol reductase                            | -1.20 | 0.026 |
| 81 | SC5D    | Sterol-c5-desaturase                                       | -1.20 | 0.020 |
| 82 | STAR    | Steroidogenic acute regulatory protein                     | -1.30 | 0.020 |
| 83 | CYP8B1  | Cytochrome p450 family 8 subfamily b member 1              | -2.30 | 0.018 |
| 84 | CAT     | Catalase                                                   | -1.20 | 0.015 |

|     |         |                                                          |       |       |
|-----|---------|----------------------------------------------------------|-------|-------|
| 85  | CYP46A1 | Cytochrome p450 family 46 subfamily a member 1           | -1.30 | 0.014 |
| 86  | HSD17B7 | Hydroxysteroid 17-beta dehydrogenase 7                   | -1.40 | 0.014 |
| 87  | AKR1D1  | Aldo-keto reductase family 1 member d1                   | -1.50 | 0.013 |
| 88  | IDI1    | Isopentenyl-diphosphate delta isomerase 1                | -1.40 | 0.011 |
| 89  | DHCR7   | 7-dehydrocholesterol reductase                           | -1.30 | 0.007 |
| 90  | MVK     | Mevalonate kinase                                        | -1.30 | 0.004 |
| 91  | LIPE    | Lipase e, hormone sensitive type                         | -1.60 | 0.003 |
| 92  | PCSK9   | Proprotein convertase subtilisin/kexin type 9            | -1.70 | 0.003 |
| 93  | FDFT1   | Farnesyl-diphosphate farnesyltransferase 1               | -1.40 | 0.003 |
| 94  | ANGPTL3 | Angiopoietin like 3                                      | -1.40 | 0.003 |
| 95  | APOA5   | Apolipoprotein a5                                        | -1.40 | 0.002 |
| 96  | TM7SF2  | Transmembrane 7 superfamily member 2                     | -2.30 | 0.001 |
| 97  | APOF    | Apolipoprotein f                                         | -1.40 | 0.001 |
| 98  | NSDHL   | NAD(P) dependent steroid dehydrogenase-like              | -2.10 | 0.001 |
| 99  | LDLR    | Low density lipoprotein receptor                         | -1.70 | 0.001 |
| 100 | CYP17A1 | Cytochrome p450 family 17 subfamily a member 1           | -4.30 | 0.001 |
| 101 | CEBPA   | CCAAT/enhancer binding protein alpha                     | -1.40 | 0.001 |
| 102 | FDPS    | Farnesyl diphosphate synthase                            | -1.90 | 0.001 |
| 103 | SREBF1  | Sterol regulatory element binding transcription factor 1 | -1.50 | 0.000 |
| 104 | ACLY    | ATP citrate lyase                                        | -2.10 | 0.000 |
| 105 | EBPL    | Emopamil binding protein like                            | -1.60 | 0.000 |
| 106 | INSIG1  | Insulin induced gene 1                                   | -2.30 | 0.000 |
| 107 | PMVK    | Phosphomevalonate kinase                                 | -1.70 | 0.000 |

---

### TCA CYCLE

| List of Gene | Gene Symbol | Gene Title                                             | Fold Change | P value |
|--------------|-------------|--------------------------------------------------------|-------------|---------|
| 1            | PCK2        | Phosphoenolpyruvate carboxykinase 2, mitochondrial     | 2.000       | 0.000   |
| 2            | IDH2        | Isocitrate dehydrogenase (NADP (+)) 2, mitochondrial   | 1.100       | 0.450   |
| 3            | SDHC        | Succinate dehydrogenase complex subunit C              | 1.000       | 0.580   |
| 4            | PCK1        | Phosphoenolpyruvate carboxykinase 1                    | 1.100       | 0.730   |
| 5            | OGDH        | Oxoglutarate dehydrogenase                             | 1.000       | 0.760   |
| 6            | CS          | Citrate synthase                                       | -1.000      | 0.820   |
| 7            | OGDHL       | Oxoglutarate dehydrogenase-like                        | -1.000      | 0.800   |
| 8            | MDH2        | Malate dehydrogenase 2                                 | -1.100      | 0.380   |
| 9            | IDH3G       | Isocitrate dehydrogenase 3 (NAD (+)) gamma             | -1.100      | 0.160   |
| 10           | PDHA1       | Pyruvate dehydrogenase (lipoamide) alpha 1             | -1.200      | 0.093   |
| 11           | ACO1        | Aconitase 1                                            | -1.200      | 0.088   |
| 12           | SUCLG2      | Succinate-CoA ligase GDP-forming beta subunit          | -1.200      | 0.035   |
| 13           | IDH3B       | Isocitrate dehydrogenase 3 (NAD (+)) beta              | -1.200      | 0.033   |
| 14           | IDH3A       | Isocitrate dehydrogenase 3 (NAD (+)) alpha             | -1.200      | 0.026   |
| 15           | IDH1        | Isocitrate dehydrogenase (NADP (+)) 1, cytosolic       | -1.200      | 0.022   |
| 16           | DLD         | Dihydrolipoamide dehydrogenase                         | -1.300      | 0.005   |
| 17           | SUCLG1      | Succinate-CoA ligase alpha subunit                     | -1.400      | 0.003   |
| 18           | DLST        | Dihydrolipoamide S-succinyltransferase                 | -1.300      | 0.002   |
| 19           | SDHB        | Succinate dehydrogenase complex iron sulfur subunit B  | -1.500      | 0.001   |
| 20           | SDHA        | Succinate dehydrogenase complex flavoprotein subunit A | -1.400      | 0.000   |
| 21           | MDH1        | Malate dehydrogenase 1                                 | -1.400      | 0.000   |
| 22           | ACO2        | Aconitase 2                                            | -1.400      | 0.000   |
| 23           | ACLY        | ATP citrate lyase                                      | -2.100      | 0.000   |
| 24           | SUCLA2      | Succinate-CoA ligase ADP-forming beta subunit          | -1.600      | 0.000   |
| 25           | PDHB        | Pyruvate dehydrogenase (lipoamide) beta                | -1.600      | 0.000   |
| 26           | DLAT        | Dihydrolipoamide S-acetyltransferase                   | -1.700      | 0.000   |
| 27           | SDHD        | Succinate dehydrogenase complex subunit D              | -1.500      | 0.000   |

**PYRUVATE METABOLISM**

| <b>List of Gene</b> | <b>Gene Symbol</b> | <b>Gene Title</b>                                  | <b>Fold Change</b> | <b>P value</b> |
|---------------------|--------------------|----------------------------------------------------|--------------------|----------------|
| 1                   | ACSS1              | Acyl-CoA synthetase short-chain family member 1    | 5.10               | 0.000          |
| 2                   | PCK2               | Phosphoenolpyruvate carboxykinase 2, mitochondrial | 2.00               | 0.000          |
| 3                   | PKM                | Pyruvate kinase, muscle                            | 1.90               | 0.000          |
| 4                   | ALDH1B1            | Aldehyde dehydrogenase 1 family member B1          | 1.30               | 0.067          |
| 5                   | ME2                | Malic enzyme 2                                     | 1.30               | 0.074          |
| 6                   | HAGHL              | Hydroxyacylglutathione hydrolase-like              | 1.10               | 0.090          |
| 7                   | PCK1               | Phosphoenolpyruvate carboxykinase 1                | 1.10               | 0.730          |
| 8                   | LDHB               | Lactate dehydrogenase B                            | 1.00               | 0.920          |
| 9                   | LDHA               | Lactate dehydrogenase A                            | 1.00               | 0.930          |
| 10                  | ALDH9A1            | Aldehyde dehydrogenase 9 family member A1          | 1.00               | 0.950          |
| 11                  | LDHAL6B            | Lactate dehydrogenase A like 6B                    | -1.10              | 0.450          |
| 12                  | ACYP2              | Acylphosphatase 2                                  | -1.10              | 0.380          |
| 13                  | MDH2               | Malate dehydrogenase 2                             | -1.10              | 0.380          |
| 14                  | ALDH7A1            | Aldehyde dehydrogenase 7 family member A1          | -1.10              | 0.310          |
| 15                  | ACOT12             | Acyl-CoA thioesterase 12                           | -1.10              | 0.260          |
| 16                  | LDHC               | Lactate dehydrogenase C                            | -1.20              | 0.140          |
| 17                  | ME3                | Malic enzyme 3                                     | -1.20              | 0.110          |
| 18                  | PDHA1              | Pyruvate dehydrogenase (lipoamide) alpha 1         | -1.20              | 0.093          |
| 19                  | GRHPR              | Glyoxylate and hydroxypyruvate reductase           | -1.10              | 0.056          |
| 20                  | ALDH2              | Aldehyde dehydrogenase 2 family (mitochondrial)    | -1.20              | 0.048          |
| 21                  | ALDH3A2            | Aldehyde dehydrogenase 3 family member A2          | -1.20              | 0.039          |
| 22                  | ACAT1              | Acetyl-CoA acetyltransferase 1                     | -1.20              | 0.033          |
| 23                  | ACYP1              | Acylphosphatase 1                                  | -1.30              | 0.012          |
| 24                  | LDHD               | Lactate dehydrogenase D                            | -1.50              | 0.008          |
| 25                  | DLD                | Dihydrolipoamide dehydrogenase                     | -1.30              | 0.005          |
| 26                  | GLO1               | Glyoxalase I                                       | -1.40              | 0.002          |
| 27                  | ACACA              | Acetyl-CoA carboxylase alpha                       | -1.40              | 0.002          |
| 28                  | ACACB              | Acetyl-CoA carboxylase beta                        | -1.90              | 0.002          |
| 29                  | HAGH               | Hydroxyacylglutathione hydrolase                   | -1.50              | 0.001          |
| 30                  | MDH1               | Malate dehydrogenase 1                             | -1.40              | 0.000          |
| 31                  | ACSS2              | Acyl-CoA synthetase short-chain family member 2    | -2.10              | 0.000          |
| 32                  | PKLR               | Pyruvate kinase, liver and RBC                     | -1.50              | 0.000          |
| 33                  | PDHB               | Pyruvate dehydrogenase (lipoamide) beta            | -1.60              | 0.000          |
| 34                  | DLAT               | Dihydrolipoamide S-acetyltransferase               | -1.70              | 0.000          |
| 35                  | ME1                | Malic enzyme 1                                     | -1.90              | 0.000          |



## FATTY ACID METABOLISM

| List of Gene | Gene Symbol | Gene Title                                              | Fold Change | P value |
|--------------|-------------|---------------------------------------------------------|-------------|---------|
| 1            | EHHADH      | Enoyl-CoA hydratase and 3-hydroxyacyl CoA Dehydrogenase | 1.60        | 0.000   |
| 2            | ALDH1B1     | Aldehyde dehydrogenase 1 family member B1               | 1.30        | 0.067   |
| 3            | ACADL       | Acyl-CoA dehydrogenase, long chain                      | 1.20        | 0.100   |
| 4            | ACOX3       | Acyl-CoA oxidase 3, pristanoyl                          | 1.00        | 0.690   |
| 5            | ACSL3       | Acyl-CoA synthetase long-chain family member 3          | 1.00        | 0.870   |
| 6            | ALDH9A1     | Aldehyde dehydrogenase 9 family member A1               | 1.00        | 0.950   |
| 7            | HADH        | Hydroxyacyl-CoA dehydrogenase                           | -1.00       | 0.880   |
| 8            | ACSL4       | Acyl-CoA synthetase long-chain family member 4          | -1.00       | 0.820   |
| 9            | CPT2        | Carnitine palmitoyltransferase 2                        | -1.00       | 0.620   |
| 10           | CPT1A       | Carnitine palmitoyltransferase 1A                       | -1.00       | 0.560   |
| 11           | HADHA       | Hydroxyacyl-CoA dehydrogenase, alpha subunit            | -1.10       | 0.480   |
| 12           | ACSL6       | Acyl-CoA synthetase long-chain family member 6          | -1.10       | 0.410   |
| 13           | ALDH7A1     | Aldehyde dehydrogenase 7 family member A1               | -1.10       | 0.310   |
| 14           | CPT1C       | Carnitine palmitoyltransferase 1C                       | -1.20       | 0.300   |
| 15           | ACADM       | Acyl-CoA dehydrogenase, C-4 to C-12 straight chain      | -1.10       | 0.290   |
| 16           | ECI2        | Enoyl-CoA delta isomerase 2                             | -1.10       | 0.140   |
| 17           | ACADS       | Acyl-CoA dehydrogenase, C-2 to C-3 short chain          | -1.20       | 0.051   |
| 18           | ALDH2       | Aldehyde dehydrogenase 2 family (mitochondrial)         | -1.20       | 0.048   |
| 19           | ACAA2       | Acetyl-CoA acyltransferase 2                            | -1.20       | 0.044   |
| 20           | ALDH3A2     | Aldehyde dehydrogenase 3 family member A2               | -1.20       | 0.039   |
| 21           | ACOX1       | Acyl-CoA oxidase 1                                      | -1.20       | 0.038   |
| 22           | ACADSB      | Acyl-CoA dehydrogenase, short/branched chain            | -1.20       | 0.033   |
| 23           | ACAT1       | Acetyl-CoA acetyltransferase 1                          | -1.20       | 0.033   |
| 24           | ADH4        | Alcohol dehydrogenase 4 (class II), pi polypeptide      | -1.40       | 0.018   |
| 25           | ADH5        | Alcohol dehydrogenase 5 (class III), chi polypeptide    | -1.30       | 0.014   |
| 26           | ACADVL      | Acyl-CoA dehydrogenase, very long chain                 | -1.20       | 0.013   |
| 27           | ECHS1       | Enoyl-CoA hydratase, short chain 1                      | -1.30       | 0.004   |
| 28           | GCDH        | Glutaryl-CoA dehydrogenase                              | -1.60       | 0.001   |
| 29           | ECI1        | Enoyl-CoA delta isomerase 1                             | -1.40       | 0.001   |
| 30           | ACSL5       | Acyl-CoA synthetase long-chain family member 5          | -1.40       | 0.001   |
| 31           | ADH7        | Alcohol dehydrogenase 7                                 | -1.80       | 0.000   |
| 32           | ACSL1       | Acyl-CoA synthetase long-chain family member 1          | -2.00       | 0.000   |

### TRIGLYCERIDE BIOSYNTHESIS PATHWAY

| List of Gene | Gene Symbol | Gene Title                                            | Fold Change | P value |
|--------------|-------------|-------------------------------------------------------|-------------|---------|
| 1            | LPCAT4      | Lysophosphatidylcholine acyltransferase 4             | 1.90        | 0.000   |
| 2            | ELOVL7      | Elovl fatty acid elongase 7                           | 2.10        | 0.000   |
| 3            | AGPAT4      | 1-acylglycerol-3-phosphate o-acyltransferase 4        | 2.00        | 0.004   |
| 4            | LPCAT1      | Llysophosphatidylcholine acyltransferase 1            | 1.70        | 0.005   |
| 5            | AGPAT1      | 1-acylglycerol-3-phosphate o-acyltransferase 1        | 1.30        | 0.005   |
| 6            | LPIN2       | Lipin 2                                               | 1.30        | 0.046   |
| 7            | LPIN3       | Lipin 3                                               | 1.20        | 0.110   |
| 8            | GPD1L       | Glycerol-3-phosphate dehydrogenase 1-like             | 1.10        | 0.170   |
| 9            | AGPAT5      | 1-acylglycerol-3-phosphate o-acyltransferase 5        | 1.10        | 0.310   |
| 10           | ELOVL2      | Elovl fatty acid elongase 2                           | 1.00        | 0.670   |
| 11           | ACSL3       | Acyl-coa synthetase long-chain family member 3        | 1.00        | 0.870   |
| 12           | AGPAT3      | 1-acylglycerol-3-phosphate o-acyltransferase 3        | -1.00       | 0.980   |
| 13           | LCLAT1      | Lysocardiolipin acyltransferase 1                     | -1.00       | 0.890   |
| 14           | ACSL4       | Acyl-coa synthetase long-chain family member 4        | -1.00       | 0.820   |
| 15           | ELOVL1      | Elovl fatty acid elongase 1                           | -1.00       | 0.800   |
| 16           | GPAT2       | Glycerol-3-phosphate acyltransferase 2, mitochondrial | -1.00       | 0.760   |
| 17           | ACSL6       | Acyl-coa synthetase long-chain family member 6        | -1.10       | 0.410   |
| 18           | TECR        | Trans-2,3-enoyl-coa reductase                         | -1.10       | 0.350   |
| 19           | ELOVL4      | Elovl fatty acid elongase 4                           | -1.20       | 0.058   |
| 20           | DGAT2       | Diacylglycerol o-acyltransferase 2                    | -1.20       | 0.051   |
| 21           | LPIN1       | Lipin 1                                               | -1.70       | 0.017   |
| 22           | AGPAT2      | 1-acylglycerol-3-phosphate o-acyltransferase 2        | -1.20       | 0.005   |
| 23           | ACACA       | Acetyl-coa carboxylase alpha                          | -1.40       | 0.002   |
| 24           | ACSL5       | Acyl-coa synthetase long-chain family member 5        | -1.40       | 0.001   |
| 25           | ELOVL5      | Elovl fatty acid elongase 5                           | -1.40       | 0.001   |
| 26           | DGAT1       | Diacylglycerol o-acyltransferase 1                    | -1.60       | 0.000   |
| 27           | ACLY        | ATP citrate lyase                                     | -2.10       | 0.000   |
| 28           | ELOVL3      | Elovl fatty acid elongase 3                           | -7.90       | 0.000   |
| 29           | HSD17B12    | Hydroxysteroid 17-beta dehydrogenase 12               | -1.70       | 0.000   |
| 30           | GPAM        | Glycerol-3-phosphate acyltransferase, mitochondrial   | -1.70       | 0.000   |
| 31           | GPD1        | Glycerol-3-phosphate dehydrogenase 1                  | -1.90       | 0.000   |
| 32           | ELOVL6      | Elovl fatty acid elongase 6                           | -2.40       | 0.000   |
| 33           | ACSL1       | Acyl-coa synthetase long-chain family member 1        | -2.00       | 0.000   |
| 34           | FASN        | Fatty acid synthase                                   | -2.70       | 0.000   |

## Supplemental Figure legends

### **Supplemental Figure 1. Effects of adenoviral injection on mouse body weight, food intake, liver weight, liver index and ALT levels.**

Male mice fed a HFD for 8 weeks were injected with Ad-shACSL1 or Ad-shU6-C. Body weight and food intake were recorded throughout the treatment duration. After 11-days of adenoviral injection, mice were sacrificed and 4-h fasting serum and liver samples were collected. All data are mean  $\pm$  SEM of 5-6 liver samples. A, Body weight measurement; B, Food intake; C, Liver weight; D, Liver index. E, ALT serum levels.

### **Supplemental Figure 2. Measurement of serum total bile acids in HFD-fed mice injected with AcshAcs11 or Ad-shU6-C.**

Male mice fed a HFD for 8 weeks were injected with Ad-shACSL1 or Ad-shU6-C. After 11-days of adenoviral injection, mice were sacrificed and 4-h fasting serum and liver samples were collected. Serum total bile acids were measured. All data are mean  $\pm$  SEM of 4-5 serum samples.

**Supplemental Figure 3.** Heatmap illustrations of down regulation of gene expression involved in indicated lipid metabolism pathways. Graphs show fold changes in all genes within the indicated pathway that have a  $p$  value  $<0.05$ .

### **Supplemental Figure 4. No effects of adenoviral injection on chow-fed mice liver phospholipids and free FA levels.**

Male C57BL/6J mice fed a NCD were injected with Ad-shACSL1 or Ad-shU6-C. After 11-days of adenoviral injection, mice were sacrificed for collections of fasting serum samples and liver tissues. Lipids were extracted from individual liver homogenates and PL and FFA contents were measured.

### **Supplementary Figure 5. Obeticholic acid (OCA) downregulated hepatic ACSL1 expression in male mice**

fed a high fat and high cholesterol diet. Male C57BL/6J mice were fed a HFHCD for 4 weeks and orally treated with OCA (n=4) at the daily dose of 40 mg/kg or vehicle (n=4) for 14 days. Liver tissues were collected after the treatment and analyzed for ACSL1 protein and mRNA levels.

**(A)** Western blot analysis of hepatic ACSL1 protein and  $\beta$ -actin levels. Levels of ACSL1 were normalized levels of  $\beta$ -actin. Significance was determined by Student's  $t$ -test.  $n = 4$  mice per group. \*\*  $p < 0.01$ .

**(B)** Real-time PCR was conducted to determine the relative expression levels of *Acs11* mRNAs after normalization with GAPDH mRNA levels. Significance was determined by Student's  $t$ -test.  $n = 4$  mice per group. \*\*  $p < 0.01$ .
